# Supplementary material for: Unconventional endosome-like compartment and retromer complex in Toxoplasma gondii govern parasite integrity and host infection
Source: PubMed Central journal article supplement (PMC4831018; doi:10.1038/ncomms11191), 2016-04-11
Supplement: ncomms11191-s1.pdf [file ncomms11191-s1.pdf]

**SUPPLEMENTARY INFORMATION**

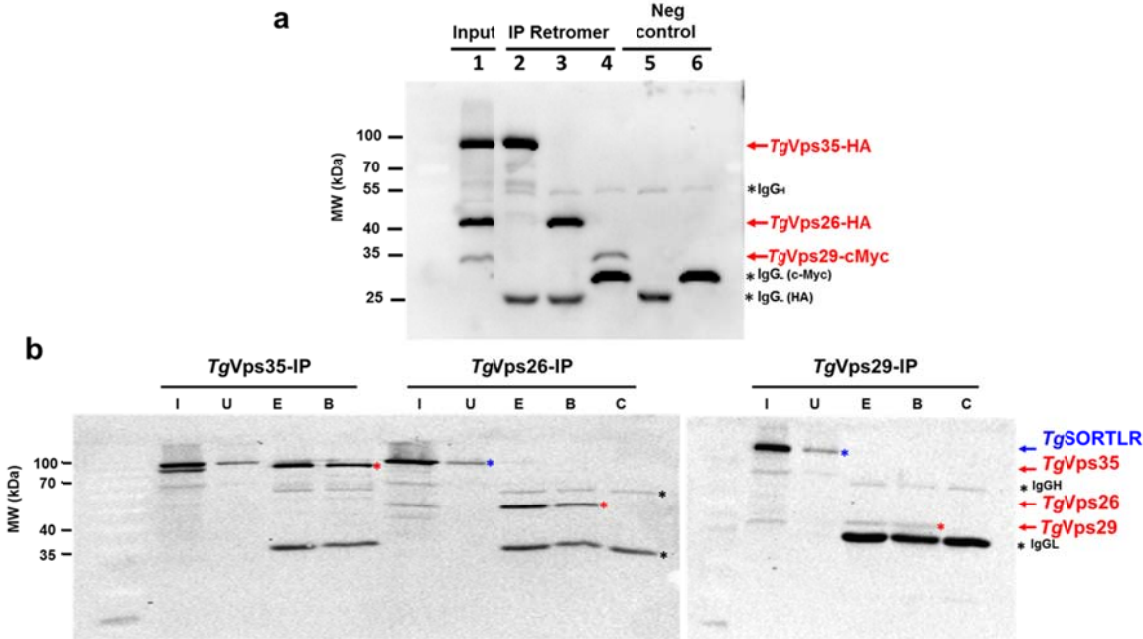

**Supplementary Figure 1: Immunoblots of co-immunoprecipitates of *TgVps35-HA*, *TgVps26-HA* and *TgVps29-cMyc***

These full blots corresponding to Figure 1a and 1b were probed with anti-HA, anti-cMyc and anti-TgSORTLR antibodies (see list of antibodies in [Supplementary Table 5](#)). Protein markers (kDa) were also shown on left. IgG<sub>h</sub> means heavy chain of IgG, IgG<sub>L</sub> means light chain of IgG.

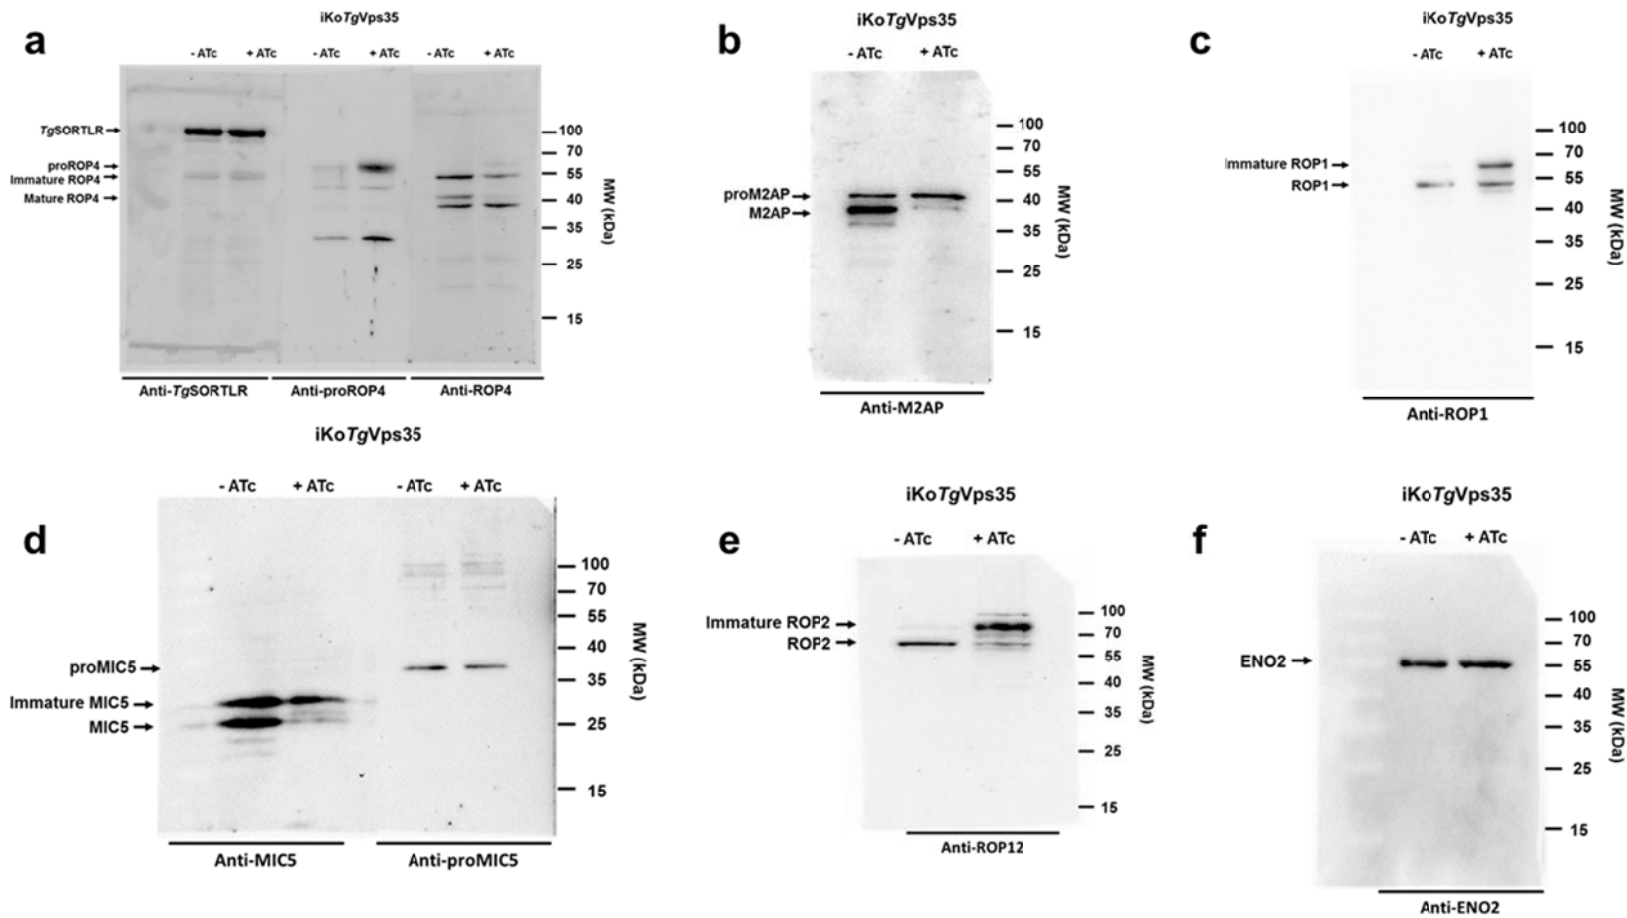

### Supplementary Figure 2: Immunoblots of iKo *TgVps35* mutant

These full blots corresponding to Figure 6 were probed with specific anti-ROP1, ROP2, proROP4, ROP4, M2AP, proMIC5 and MIC5 antibodies (see list of antibodies in [Supplementary Table 5](#)) after 48h post-infection in the presence or absence of ATc. *TgSORTLR* and ENO2 protein were used as loading protein control. Protein markers (kDa) were also shown on right.



experiments using anti-GST antibodies. Input corresponds to the total detergent protein extract containing *TgVps35*-HA and *TgVps26*-HA stained with anti-HA antibodies. Molecular weights (kDa) are shown on left.

**(b-d)** Quantification showing the ratio of the intensity of *TgVsp35* and *TgVsp26* detected in the upper panel of **(a)** versus the signal of the corresponding Rab5B, Rab7, and Rab11B proteins used for the GST pull-down. **(e)** GST alone was used as a negative control for the GST pull down experiments described above.

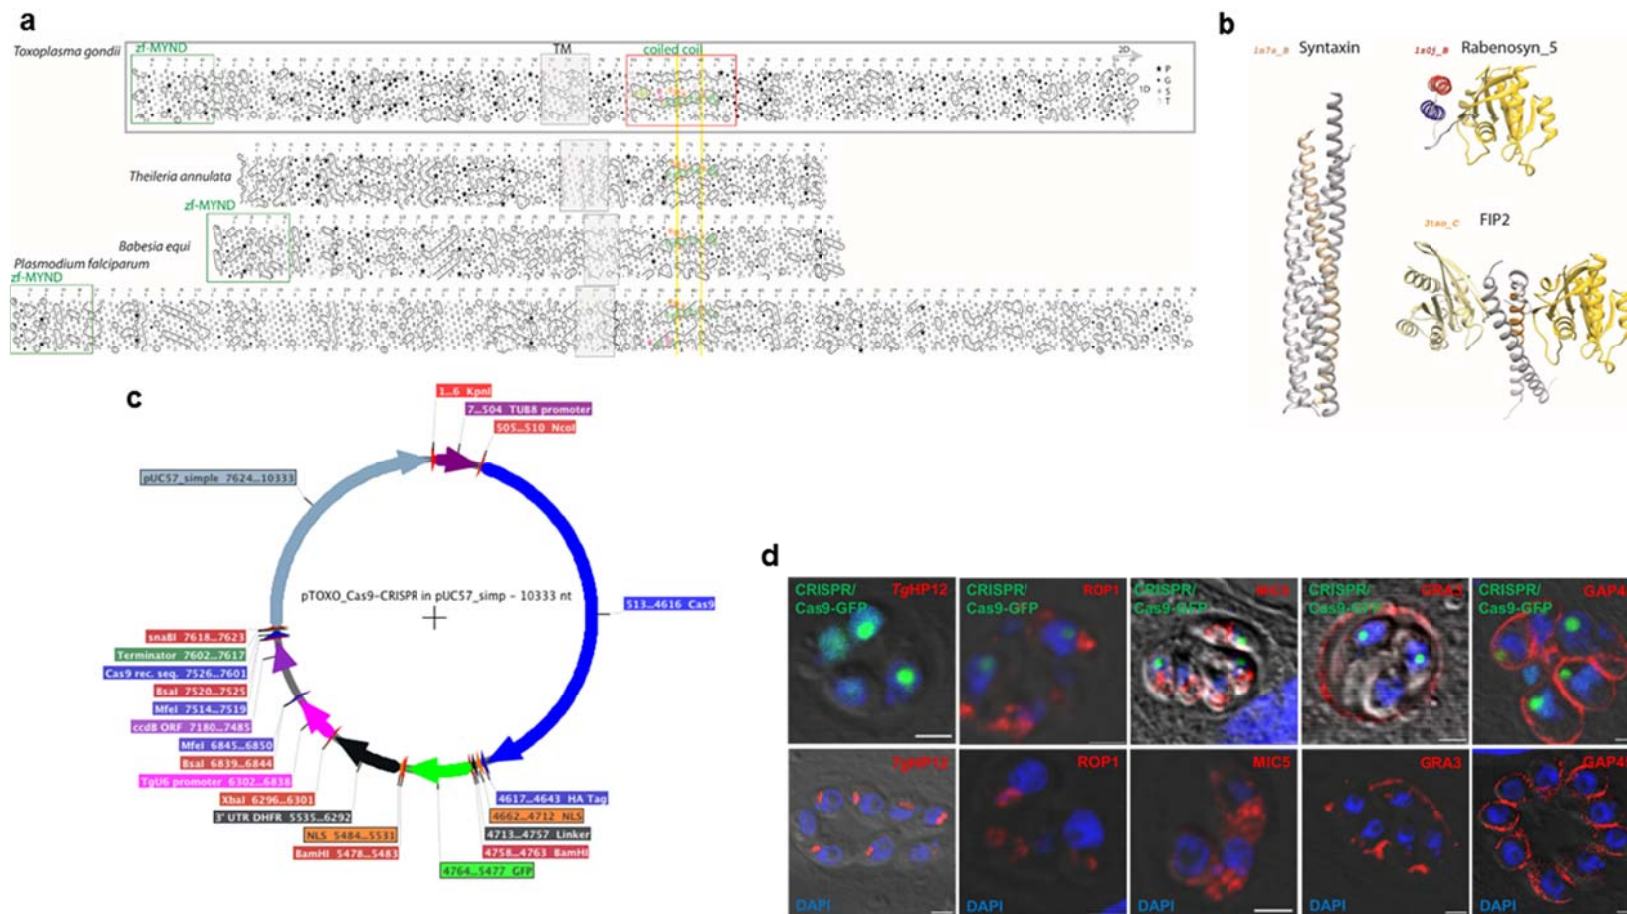

**Supplementary Figure 4: Bioinformatics and genetic analyses of *TgHP12***

(a) Hydrophobic cluster analysis<sup>1</sup> was used to identify *TgHP12* homologs. The sequences are shown on a duplicated helical net, which displays the contours of the hydrophobic amino acids (V I L M F Y W) that form clusters corresponding to the internal faces of the regular secondary structures. A conserved helical region (boxed) is highlighted on the entire *TgHP12* sequences following a

putative transmembrane (TM) segment. Cluster similarities are indicated in green, whereas sequence identities and similarities are shown in orange and pink, respectively.

**(b)** Experimental 3D structures of proteins are shown to include segments (colored), which share some sequence similarities with the conserved helical region of *TgHP12*. Using the profile-profile comparison tool HH-PRED<sup>2</sup>, potential relationships of the *TgHP12* helical region were highlighted with two helical structures present in rabenosyn-5 and FIP2, which are known to be involved in the interaction with the Rab switch regions<sup>3,4</sup>. The colored segments correspond to those highlighted on the sequence alignment shown in Figure 8a. Rab proteins are shown in yellow (at right). Another putative similarity was also established with the coiled-coil region of syntaxin, which shares typical heptad repeats with *TgHP12*<sup>5</sup>.

**(c)** Map of plasmid used for *TgHP12* disruption by CRISPR/Cas9 system.

**(d)** Confocal images of intracellular tachyzoites in which the *TgHP12* gene was disrupted by transient transfection of CRISPR/Cas9. These parasites were directly observed for GFP expression or stained with anti-ROP1, anti-MIC5, anti-GRA3, or anti-GAP45 antibodies (upper panels). As negative controls (lower panels), parental tachyzoites were not transfected and observed for GFP or stained with the same antibodies. Note that there is no phenotypic difference between Cas9-mediated disruption of *TgHP12* and the parental parasites for biogenesis of rhoptries, micronemes, and dense granules. Bars=2  $\mu$ m.

| Protein Name   | IP <i>TgVps26</i> |               | IP <i>TgVps29</i> |               | IP <i>TgVps35</i> |               |
|----------------|-------------------|---------------|-------------------|---------------|-------------------|---------------|
|                | Quantity (fmol)   | Stoichiometry | Quantity (fmol)   | Stoichiometry | Quantity (fmol)   | Stoichiometry |
| <i>TgVps26</i> | 25 ± 2            | 1.0           | 39 ± 12           | 0.3           | 21.4 ± 0.9        | 0.7           |
| <i>TgVps29</i> | 8 ± 1             | 0.3           | 138 ± 34          | 1.0           | 12 ± 2            | 0.4           |
| <i>TgVps35</i> | 31.4 ± 0.4        | 1.3           | 54 ± 2            | 0.4           | 29.6 ± 0.4        | 1.0           |

**Supplementary Table 1: Absolute quantification of each retromer component.**

Quantification was performed using LC-SRM and isotope-labeled reference peptides. Protein ratios from duplicate experiments were averaged, and protein stoichiometry was shown. Also see more detail in [Supplementary Data 2](#).

| Accession    | Name            | MW [kDa] | $\Sigma$ coverage (%) | $\Sigma$ Unique Peptides | $\Sigma$ Peptides |
|--------------|-----------------|----------|-----------------------|--------------------------|-------------------|
| TGGT1_294220 | <i>TgHP12</i>   | 62.2     | 78                    | 53                       | 53                |
| TGGT1_290160 | <i>TgSORTLR</i> | 113.4    | 35                    | 32                       | 32                |
| TGGT1_263500 | <i>TgVps26</i>  | 42.2     | 8                     | 2                        | 2                 |
| TGGT1_242660 | <i>TgVps35</i>  | 95.5     | 7                     | 5                        | 5                 |
| TGGT1_252490 | <i>TgVps29</i>  | 22.3     | 6                     | 1                        | 1                 |

**Supplementary Table 2: Identification of *TgHP12* by mass spectrometry**

Co-immunoprecipitates of *TgHP12* using anti-HA beads and total detergent protein extract from the knock-in *TgHP12*-HA parasites were analyzed by mass spectrometry to reveal the presence of *TgVps35*, *TgVps29*, *TgVps26*, and *TgSORTLR* that were specifically pulled down as compared to the naïve sera. Also see more detail in [Supplementary Data 3](#).



| Name                | 5' Sequence 3'                                                           | Restriction sites |
|---------------------|--------------------------------------------------------------------------|-------------------|
| iKO_TgVps35_3'_F    | CCGGGGATCCATGtaccatacgatgttccagattacgctATTATGGAACACGATCAAGAAAACTGCTGGA   | BamHI             |
| iKO_TgVps35_3'_R    | CCGGCCTAGGAATTCAAAGAAGTGACTGCAAAGAGAGATCCA                               | AvrII             |
| iKO_TgVps35_5'_F    | CCGGCATATGTGGTGTGGCTCGTTGAAATTCTCC                                       | NdeI              |
| iKO_TgVps35_5'_R    | CCGGCATATGTCTCGAGCACTTTGGGAGACTCCAA                                      | NdeI              |
| iKO_test1_TgVps35_F | GGCATCTGCGAGACCTGCACCCAG                                                 | none              |
| DHFR-int_R          | GGCGTTGAATCTCTTGCCGACTGTGGAGAGGGAAGTCC                                   | none              |
| complTgVps35prom_F  | ccggGGCGCGCCGATTGGTGTGGCTCGTTGAAATTCTCCTC                                | AscI              |
| complTgVps35prom_R  | ccggGGCGCGCCTCTCGACAACCTGGGAGACTCCAACAG                                  | AscI              |
| complFLTgVps35_F    | ccggGGCGCGCCgagcagaagctgatctcagaggaggacctgATTATGGAACACGATCAAGAAAACTGCTGG | AscI              |
| complFLTgVps35_R    | ccggCCCGGGCTAAGATGTTGAAACACTGATTTCAATTCAGTCCAGT                          | XmaI              |
| KI_TgVps35HA_F      | TACTTCCAATCCAATTTAATGCCAAGAGTGGGTGTACAGTTACCTGCC                         | None              |
| KI_TgVps35HA_R      | TCCTCCACTTCCAATTTTAGCAGATGTTGAAACACTGATTTCAATTCAGTCCAGTGAGTCC            | None              |
| KI_TgVps26HA_F      | TACTTCCAATCCAATTTAATGCCGCGGCTGTCTCTGCATAGGTG                             | None              |
| KI_TgVps26HA_R      | TCCTCCACTTCCAATTTTAGCCCCGATCTTCTTCTCCACATTGTGAT                          | None              |
| KI_TgVps29myc_F     | TACTTCCAATCCAATTTAATGCCCGATGCGGCCGAGCGGTCAAAAA                           | None              |
| KI_TgVps29myc_R     | TCCTCCACTTCCAATTTTAGCTTTCTCGGCGGAGCTGGCAGCGTC                            | None              |
| KI_HP12myc_F        | TACTTCCAATCCAATTTAATGCATGGCAACGATGGTCACCTGCCAG                           | None              |
| KI_HP12myc_R        | TCCTCCACTTCCAATTTTAGCCAATCTGTCAAGTCTTCTCCAGTCA                           | None              |
| KI_HP03myc_F        | TACTTCCAATCCAATTTAATGCGCTGGCTGGCGCACGAAACCTCCGA                          | none              |
| KI_HP03myc_R        | TCCTCCACTTCCAATTTTAGCAGCGGAGTCTTTCGGTGGCGTCACC                           | none              |
| Recomb_HP12_F       | CCGGGGATCCGTAGAAAAGCCTACAACGGTGGGG                                       | BamHI             |
| Recomb_HP12_R       | CCGGGCGGCCGCTCACAATCTGTCAAGTCTTCTCCAGTC                                  | NotI              |

### Supplementary Table 3: Complete list of primers used in this study

iKo, inducible conditional knock-out; KI, knock-in; Comp-, complementation; F, forward primer; R, reverse primer; Recomb, primer for recombinant protein.

| <b>Name</b>                        | <b>Linearisation site</b> | <b>Purpose</b>      |
|------------------------------------|---------------------------|---------------------|
| pDTS4 iKO <i>TgVps35</i>           | Apal                      | Knock Out           |
| pUPRT FL <i>TgVps35</i>            | None                      | Knock Out           |
| pLIC-HA-DHFR <i>TgVps35</i>        | EcoRV                     | Knock In            |
| pLIC-HA-DHFR <i>TgVps26</i>        | EcoRV                     | Knock In            |
| pLIC-Cmyc-DHFR<br><i>TgVps29</i>   | MfeI                      | Knock In            |
| pLIC-Cmyc-TUB5CAT<br><i>TgHP03</i> | BstBI                     | Knock In            |
| pLIC-Cmyc-TUB5CAT<br><i>TgHP12</i> | EcoRV                     | Knock In            |
| pGEX- <i>TgHP12</i> -Cter          | None                      | Recombinant protein |

**Supplementary Table 4: Complete list of plasmids used in this study**

These plasmids were used for parasite knock out, knock in or recombinant protein expression. The restriction enzymes used to linearize these plasmids are indicated otherwise stated.

| Name                   | Species | Dilution<br>(Immunofluorescence<br>or IFA) | Dilution<br>(Western<br>Blot) | Origin             |
|------------------------|---------|--------------------------------------------|-------------------------------|--------------------|
| Anti-HA                | Rabbit  | 1/500                                      | 1/500                         | Cell Signaling     |
| Anti-HA                | Rat     | 1/200                                      | 1/500                         | Roche              |
| Anti-cMyc              | Mouse   | 1/500                                      | 1/500                         | Pierce<br>(Thermo) |
| Anti- <i>Tg</i> SORTLR | Rat     | 1/700                                      | 1/700                         | Tomavo Lab         |
| Anti-MIC2              | Mouse   | 1/500                                      |                               |                    |
| Anti-proM2AP           | Rabbit  | 1/500                                      | 1/500                         | Carruthers<br>Lab  |
| Anti-M2AP              | Rabbit  | 1/500                                      | 1/500                         | Carruthers<br>Lab  |
| Anti-proMIC5           | Rabbit  | 1/200                                      | 1/500                         | Carruthers<br>Lab  |
| Anti-MIC5              | Rat     | 1/500                                      | 1/500                         | Carruthers<br>Lab  |
| Anti-ROP1              | Mouse   | 1/500                                      | 1/500                         | Dubremetz<br>Lab   |
| Anti-ROP2-3            | Mouse   | 1/500                                      |                               | Dubremetz<br>Lab   |
| Anti-proROP4           | Rabbit  | 1/500                                      | 1/500                         | Gary Ward<br>Lab   |
| Anti-ROP4              | Rabbit  | 1/500                                      | 1/500                         | Dubremetz<br>Lab   |
| Anti-GRA1              | Mouse   | 1/500                                      | 1/500                         | Dubremetz<br>Lab   |
| Anti-GRA3              | Mouse   | 1/500                                      | 1/1000                        | Dubremetz<br>Lab   |
| SAG1                   | Mouse   | 1/200                                      |                               | Tomavo Lab         |
| Anti-CPL               | Rabbit  | 1/200                                      |                               | Carruthers<br>Lab  |
| Anti-VP1               | Rabbit  | 1/400                                      |                               | Carruthers<br>Lab  |
| Anti-HP12              | Rat     | 1/500                                      | 1/500                         | Tomavo Lab         |

**Supplementary Table 5: Complete list of antibodies used in this study**

The source, origin and dilution of each antibody used for western blots or immunofluorescence assays are indicated.

## SUPPLEMENTARY REFERENCES

1. Callebaut, I., *et al.* Deciphering protein sequence information through hydrophobic cluster analysis (HCA): current status and perspectives. *Cell Mol Life Sci.* **53**, 621-645 (1997).
2. Söding, J., Biegert, A. & Lupas, A. N. The HHpred interactive server for protein homology detection and structure prediction. *Nucleic Acids Res.* **33**, W244-248 (2005).
3. Eathiraj, S., Pan, X., Ritacco, C. & Lambright, D. G. Structural basis of family-wide Rab GTPase recognition by rabenosyn-5. *Nature* **436**, 415-419 (2005).
4. Lall, P., *et al.* Structural and functional analysis of FIP2 binding to the endosome-localised Rab25 GTPase. *Biochim. Biophys. Acta.* **1834**, 2679-2690 (2013).
5. Ernst, J. A. & Brunger, A. T. High resolution structure, stability, and synaptotagmin binding of a truncated neuronal SNARE complex. *J. Biol. Chem.* **278**, 8630-8636 (2003).
